# Supplementary material for: Integrated presentation of ecological risk from multiple stressors
Source: PubMed Central journal article supplement (PMC5080554; doi:10.1038/srep36004), 2016-10-26
Supplement: srep36004-s1.pdf [file srep36004-s1.pdf]

# Integrated presentation of ecological risk from multiple stressors

**Benoit Goussen<sup>1,2,\*</sup>, Oliver R. Price<sup>2</sup>, Cecilie Rendal<sup>2</sup>, and Roman Ashauer<sup>1</sup>**

<sup>1</sup>Environment Department, University of York, Heslington, York, YO10 5DD, United Kingdom

<sup>2</sup>Safety and Environmental Assurance Centre, Colworth Science Park, Unilever, Sharnbrook, Bedfordshire, United Kingdom

\*benoit.goussen@gmail.com

## Supporting information

### Inter-individual variability

The inter-individual variability was achieved according to the method describe by Kooijman et. al.<sup>1</sup> To do so, each combination was simulated three times whilst sampling DEB model parameters by multiplying the input DEB parameters linked to the surface-area-specific maximum assimilation rate of an individual by a scatter-multiplier. The multiplier was derived from a log-normal distribution with standard deviation of 0.05.<sup>1,2</sup>

### Monte-Carlo simulations

We used Monte-Carlo simulations to sample parameters values in the Chemical stress level, Temperature, and Food distributions (Chemical stress level  $\times$  Temperature stress  $\times$  Food stress  $\times$  Stochasticity). We performed 7680 runs for the Temperate scenario ( $16 \times 8 \times 20 \times 3$ ) and 8640 runs for the Tropical scenario ( $16 \times 9 \times 20 \times 3$ ) which allow us to cover efficiently the distribution of the selected parameters.

**Table S1.** DEB-IBM parameters values.

| Parameter      | Description                                                                     | Value                                               |
|----------------|---------------------------------------------------------------------------------|-----------------------------------------------------|
| $\kappa$       | Fraction of mobilised energy to soma (-)                                        | 0.678 <sup>3</sup>                                  |
| $\kappa_R$     | Fraction of reproduction energy fixed in eggs (-)                               | 0.95 <sup>3</sup>                                   |
| $\dot{k}_m$    | Somatic maintenance rate coefficient (d <sup>-1</sup> )                         | 0.3314 <sup>3</sup>                                 |
| $\dot{k}_j$    | Maturity maintenance rate coefficient (d <sup>-1</sup> )                        | 0.1921 <sup>3</sup>                                 |
| $U_H^b$        | Scaled maturity at birth (dmm <sup>2</sup> )                                    | 0.1108 <sup>3</sup>                                 |
| $U_H^p$        | Scaled maturity at puberty (dmm <sup>2</sup> )                                  | 2.547 <sup>4</sup>                                  |
| $\dot{v}$      | Energy conductance (mm d <sup>-1</sup> )                                        | 18.1 <sup>3</sup>                                   |
| $g$            | Energy investment ratio (-)                                                     | 10 <sup>3</sup>                                     |
| $\dot{h}_a$    | Hazard rate - ageing parameter (d <sup>-2</sup> )                               | 3.04 × 10 <sup>-6</sup> , <sup>3</sup>              |
| $s_G$          | Gompertz stress coefficient (-)                                                 | 0.019 <sup>3</sup>                                  |
| $cv$           | Coefficient of variation of the parameter values (-)                            | 0.05 <sup>3</sup>                                   |
| $\{J_{XAm}\}$  | Maximum specific ingestion rate (algae-cells mm <sup>-2</sup> d <sup>-1</sup> ) | 380000 <sup>3</sup>                                 |
| $H$            | Half-saturation coefficient (algae-cells cm <sup>-3</sup> )                     | 1585 <sup>3</sup>                                   |
| $juv-mort$     | Juvenile resource-dependant mortality rate (d <sup>-1</sup> )                   | 0.09 <sup>3</sup>                                   |
| $t-molt$       | Days between reproduction molts (d)                                             | 2.8 <sup>3</sup>                                    |
| $\rho$         | Resource dilution rate (d <sup>-1</sup> )                                       | $U [0.005, 0.1]$                                    |
| $R_{Max}$      | Maximum resource density (algae-cells cm <sup>-3</sup> )                        | 7925 <sup>4</sup>                                   |
| $Volume$       | Volume of the water simulated (cm <sup>3</sup> )                                | 200000                                              |
| $Stress-level$ | Level of chemical stress (-)                                                    | $U [0, 1.5]$ [4, Based on]                          |
| $T$            | Temperature of the environment (°C)                                             | Based on rivers Thames and Brahmaputra <sup>5</sup> |
| $T_A$          | Arrhenius temperature (K)                                                       | 6400 <sup>6</sup>                                   |
| $T_{ref}$      | Reference temperature (K)                                                       | 293 <sup>6</sup>                                    |

The uniform distribution between a and b is noted  $U [a, b]$ .

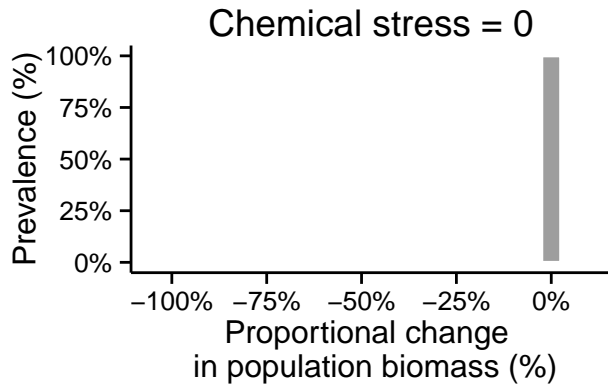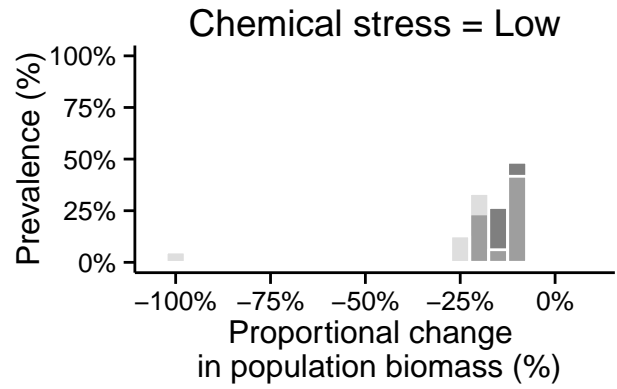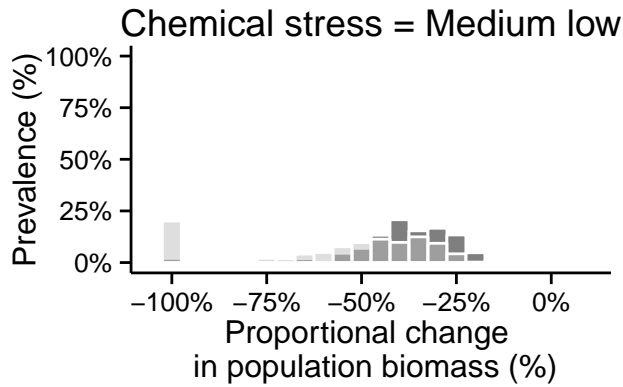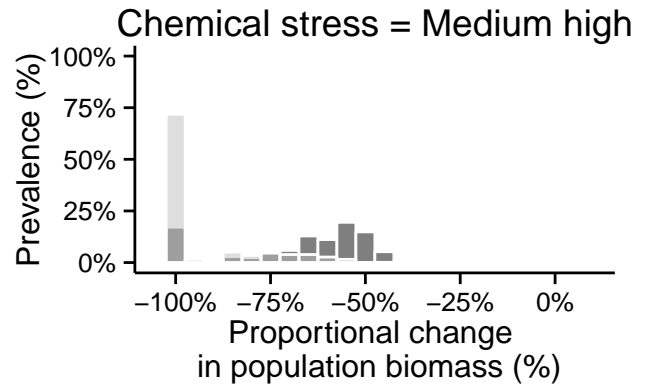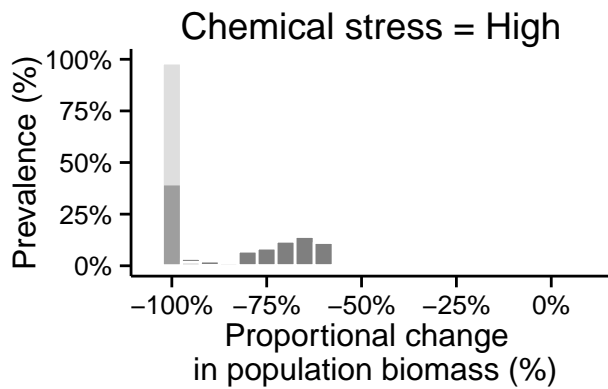

**Figure S1.** Effect-size prevalence histogram. Prevalence distribution of the relative population biomass for the Temperate (dark grey) and the Tropical (light grey) conceptual scenarios for the four ranges of chemical stress level.

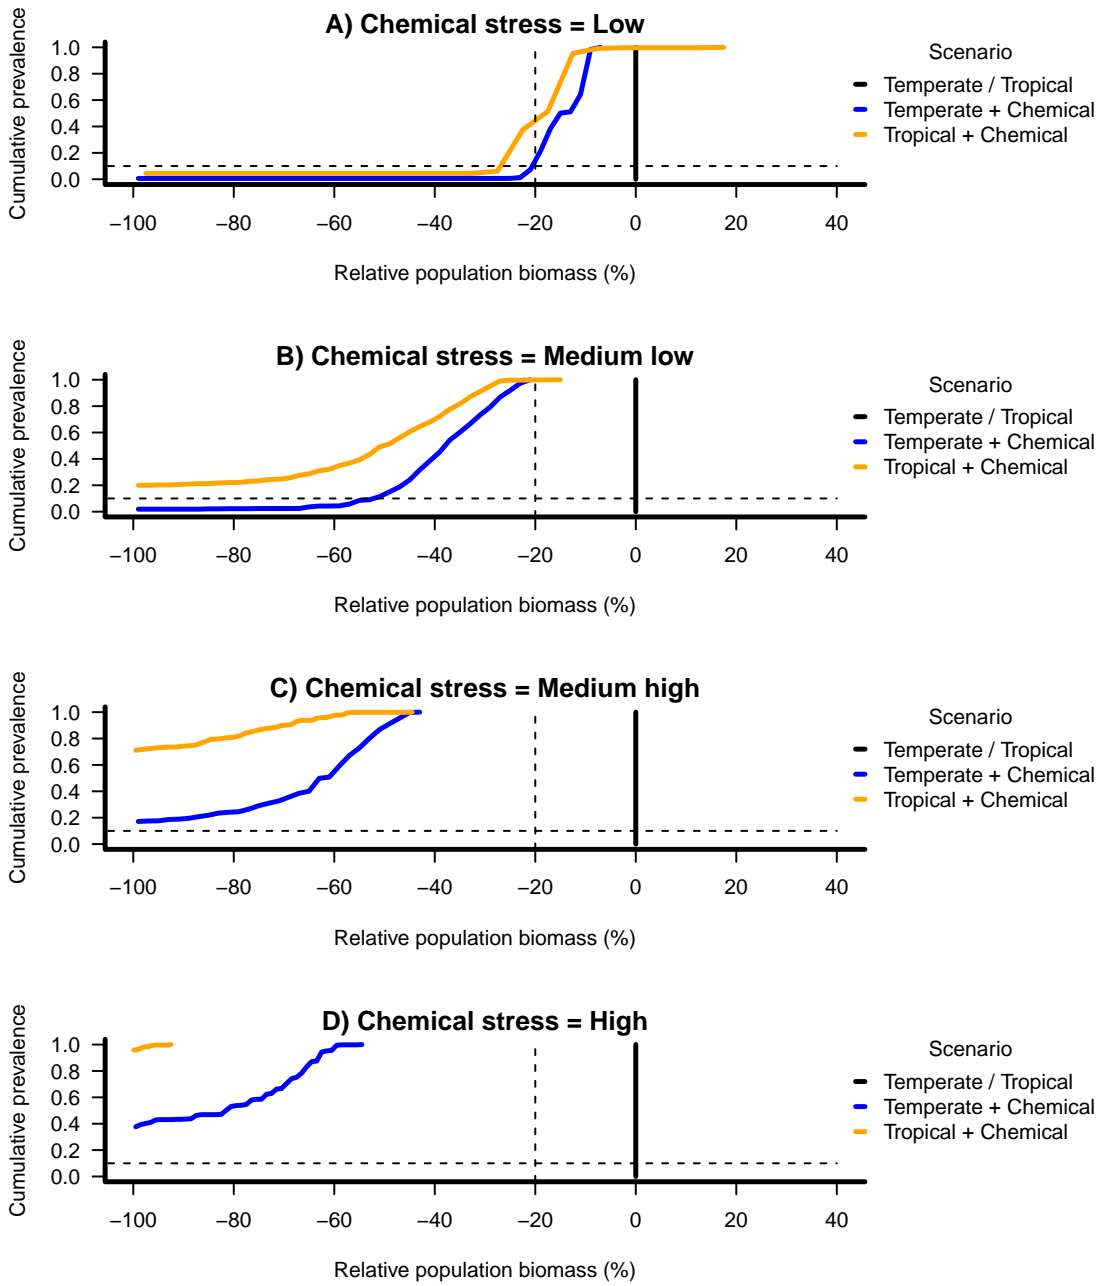

**Figure S2.** Effect-size prevalence plot. Population biomass relative to the no-chemical stress level population biomass (baseline) as a function of the cumulative prevalence for the baseline state, the Temperate and the Tropical scenarios and for a low, medium low, medium high, and high level of chemical stress.

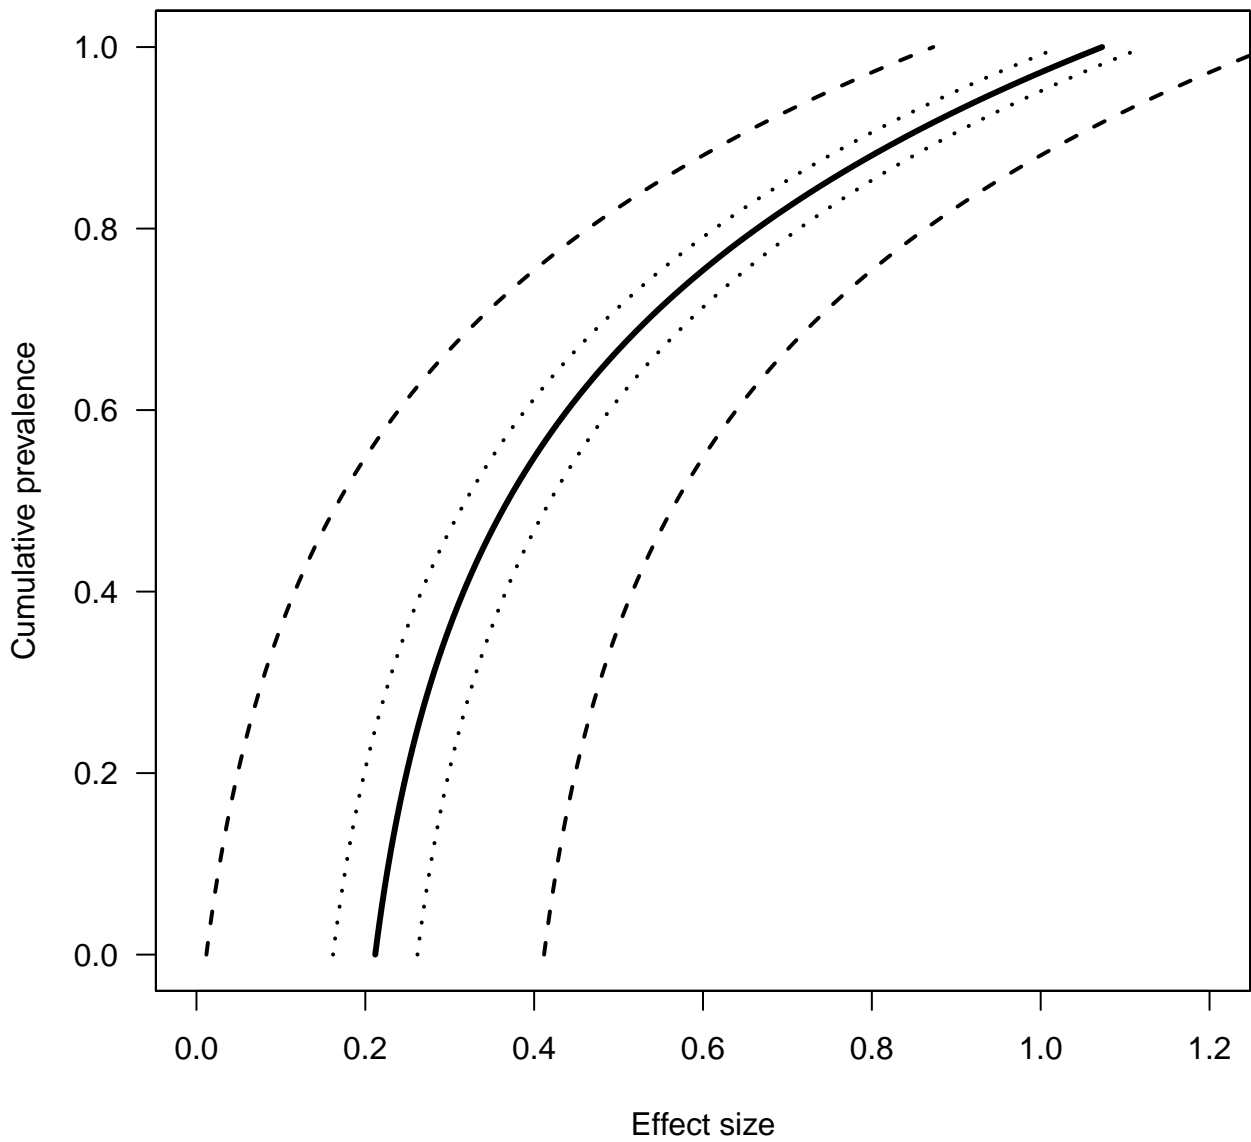

**Figure S3.** Prevalence plot with uncertainties. Representation of an effect size as a function of its cumulative prevalence (*solid line*) with a low tier (*dashed lines*) and a high tier (*dotted lines*) uncertainty analysis.

## References

1. Kooijman, S. A. L. M., Van Der Hoeven, N. & Van Der Werf, D. C. Population consequences of a physiological model for individuals. *Funct. Ecol.* **3**, 325–336 (1989). URL <http://www.jstor.org/stable/2389373>.
2. Martin, B. T., Zimmer, E. I., Grimm, V. & Jager, T. Dynamic Energy Budget theory meets individual-based modelling: a generic and accessible implementation. *Methods Ecol. Evol.* **3**, 445–449 (2012).
3. Martin, B. T., Jager, T., Nisbet, R. M., Preuss, T. G. & Grimm, V. Predicting Population Dynamics from the Properties of Individuals: A Cross-Level Test of Dynamic Energy Budget Theory. *Am. Nat.* **181**, 506–519 (2013).
4. Martin, B. T., Jager, T., Nisbet, R. M., Preuss, T. G. & Grimm, V. Limitations of extrapolating toxic effects on reproduction to the population level. *Ecol. Appl.* **24**, 1972–1983 (2014).
5. GEMStat. United nations environment programme global environment monitoring system water programme (2004). GEMStat © 2004.
6. Kooijman, S. A. L. M. *Dynamic Energy Budget Theory for Metabolic Organisation* (Cambridge University Press, Cambridge, 2010), third edn.
